# Supplementary material for: Encapsulation-Dependent Enhanced Emission of Near-Infrared Nanoparticles Using in vivo Three-Photon Fluorescence Imaging
Source: PubMed Central journal article supplement (PMC7511574; doi:10.3389/fbioe.2020.01029), 2020-09-10
Supplement: Data_Sheet_1.pdf [file Data_Sheet_1.pdf]

*Supplementary Material*

**Figure S1.** <sup>1</sup>H NMR spectrum of TPABDFN.

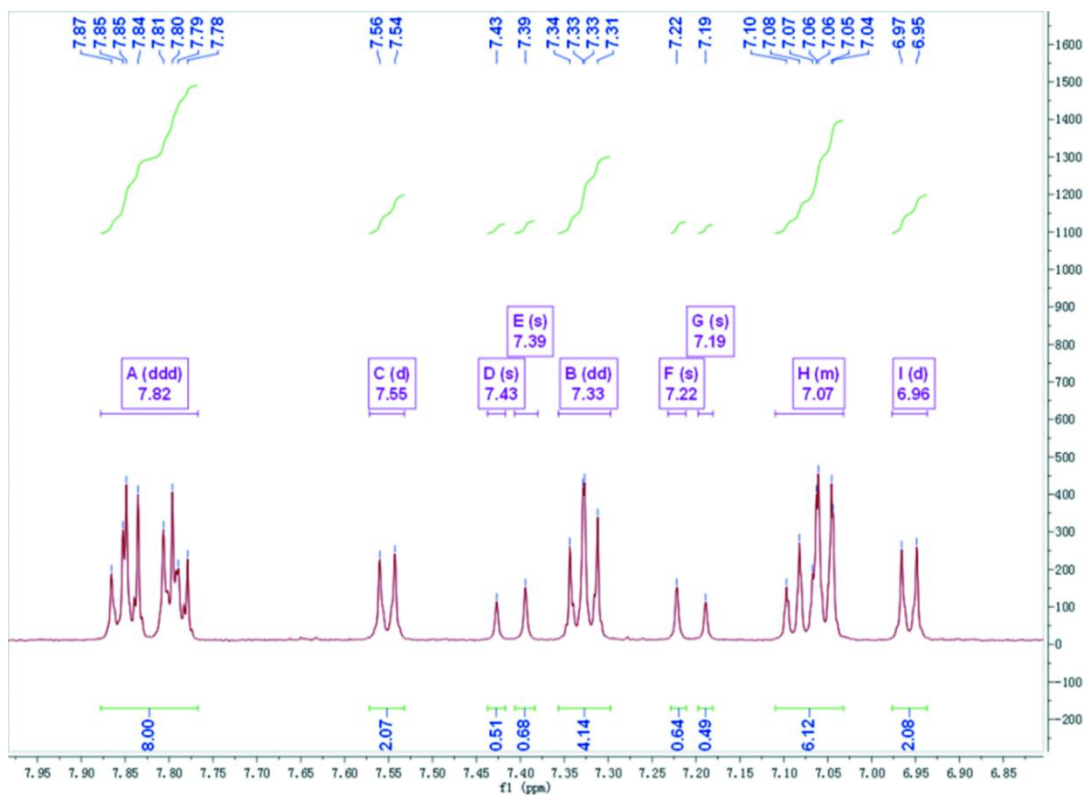

**Figure S2.** High-resolution mass spectrum (HRMS) of TPABDFN.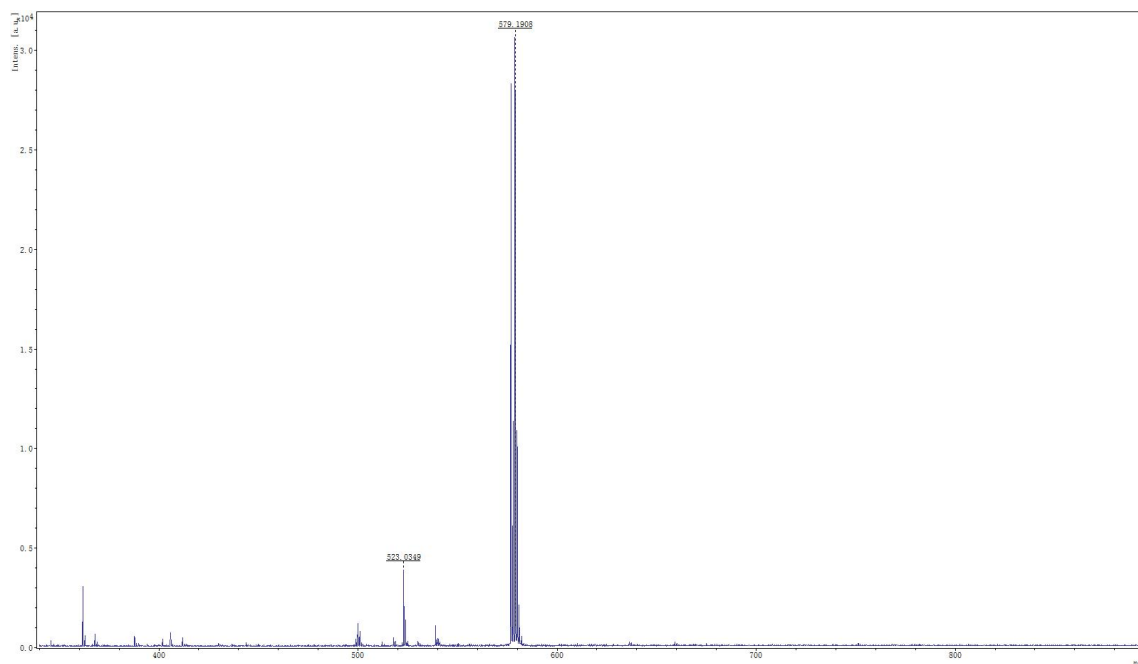**Figure S3.** UV – vis absorption and PL emission spectra (excitation wavelength: 365 nm) of F127@TB NPs.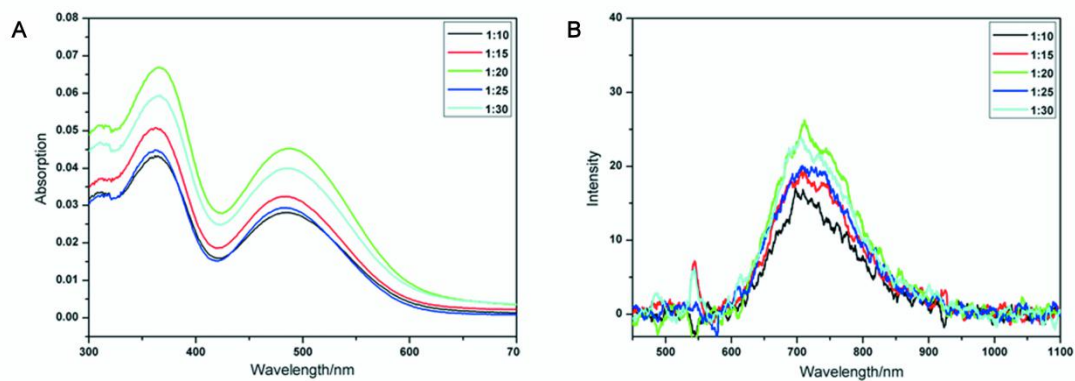

**Figure S4.** UV-vis absorption and PL emission spectra (excitation wavelength: 365 nm) of PSMA@TB

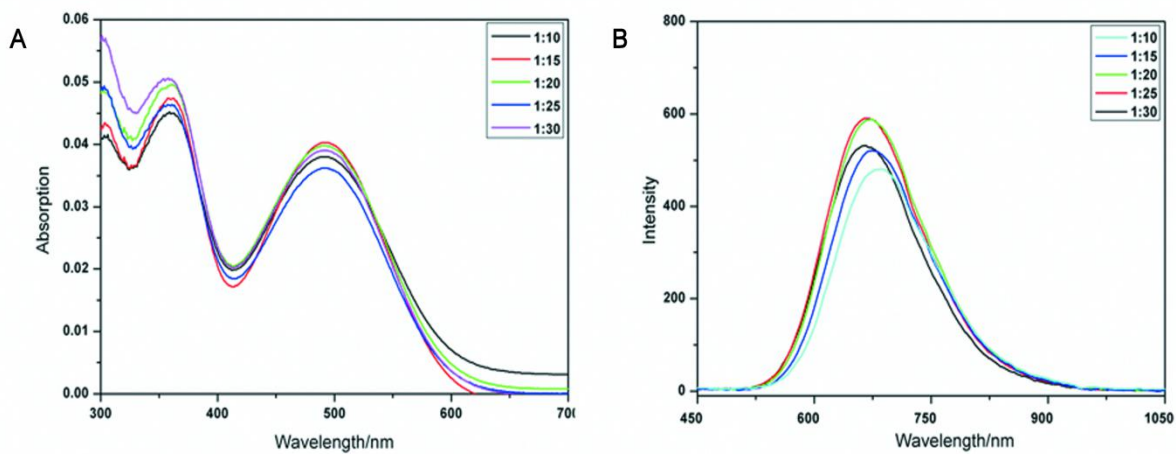

**Figure S5.** UV-vis absorption and PL emission spectra (excitation wavelength: 365 nm) of PSMA@2TBNPs

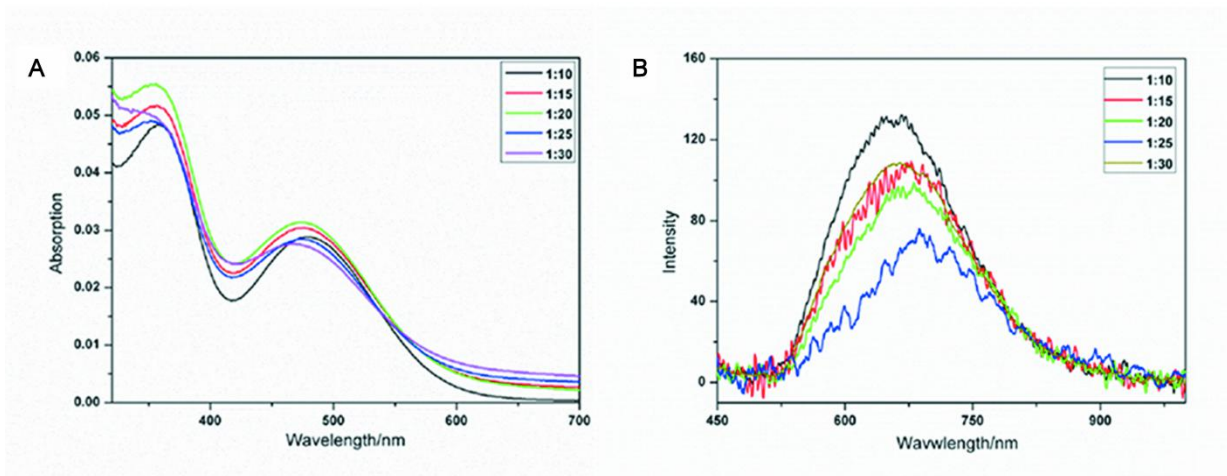

**Figure S6.** UV-vis absorption and PL emission spectra (excitation wavelength: 365 nm) of PS-PEG @TB

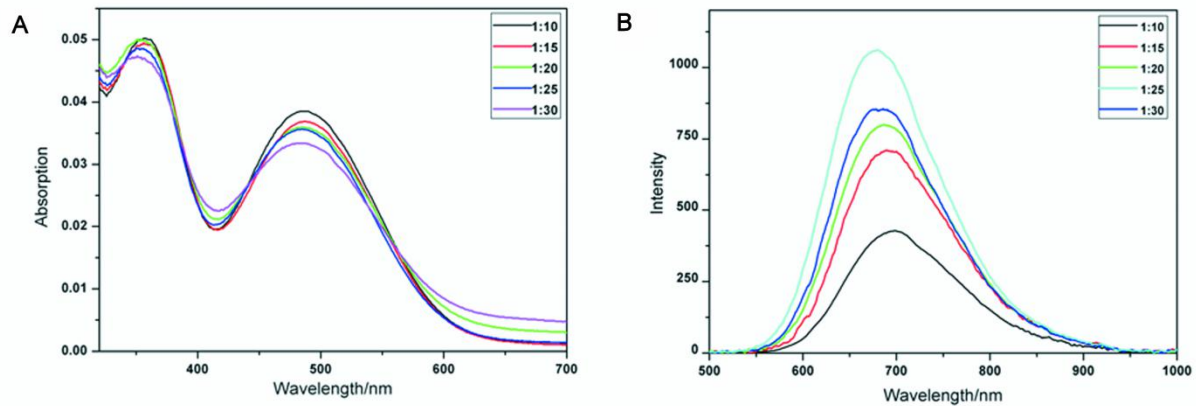

**Figure S7.** (A) Change trend chart of fluorescence quantum yield which different polymers encapsulated TB in a series of mass ratio. (B) Trend chart of maximum emission wavelength of different ratio polymers encapsulated dyes

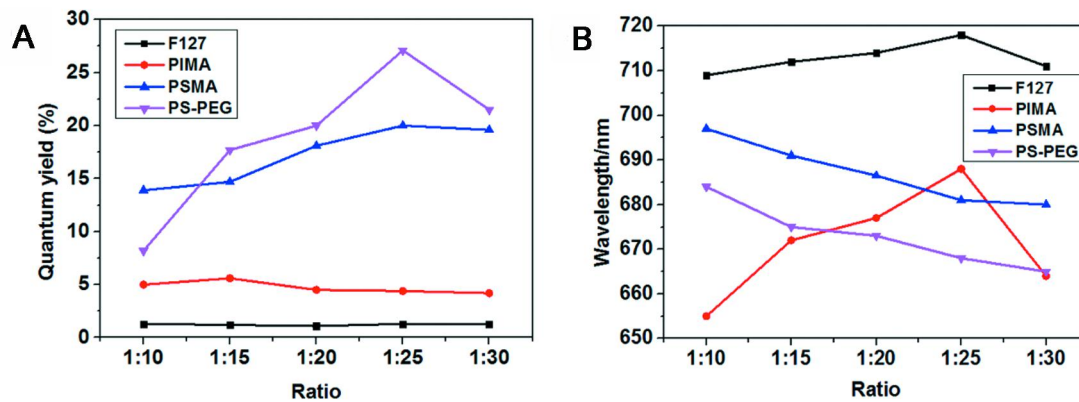

**Figure S8.** Time-resolved fluorescence spectra of different polymer encapsulated TB

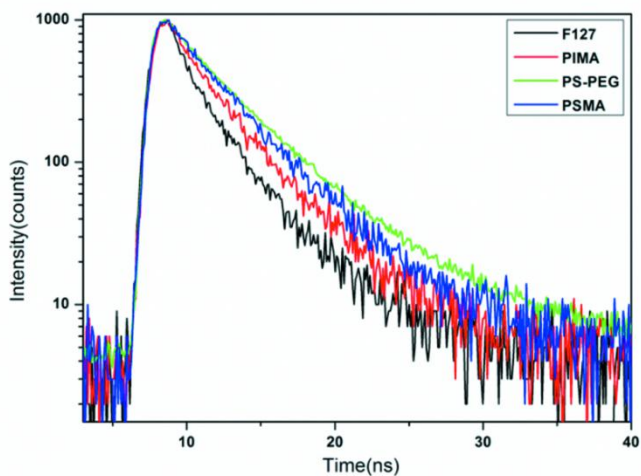

**Figure S9.** The DLS distribution of (A) PS-PEG@TB NPs, (B) PIMA@TB NPs, (C) F127@TB NPs and (D) PSMA@TN NPs. The average effective diameter are 61.0 nm, 67.5 nm, 50.3 nm and 66.1 nm respectively.

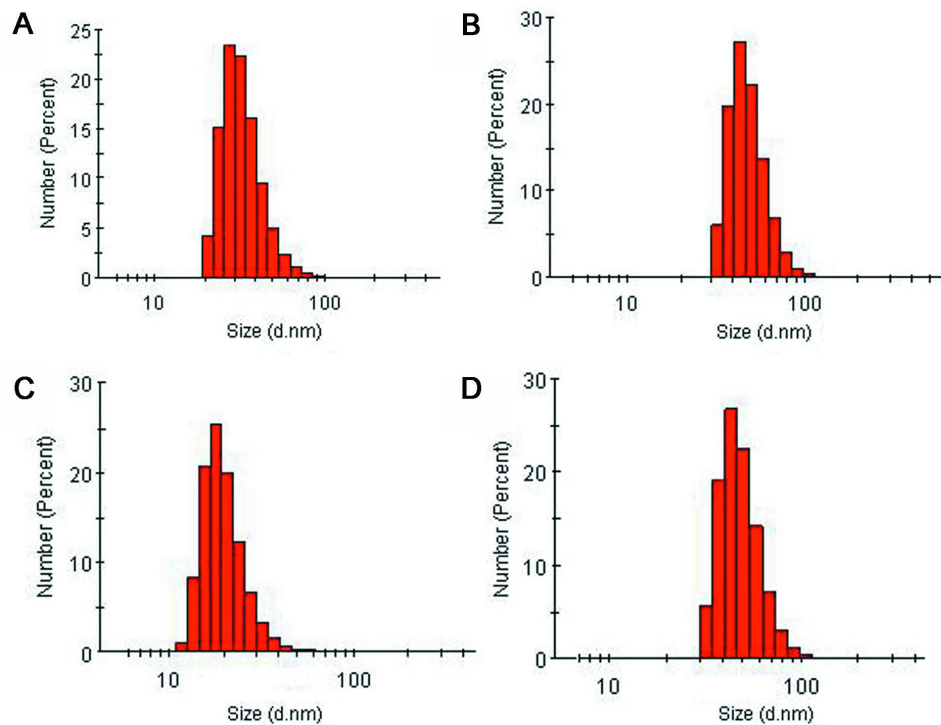

**Figure S10.** The Zeta potential distribution of **(A)** PS-PEG@TB NPs, **(B)**F127@TB NPs, **(C)**PSMA@TB NPs and **(D)**PIMA@TN NPs . The apparent Zeta potential are -12.5 mV, -11.6 mV, -44.6 mV and -35.7 mV respectively.

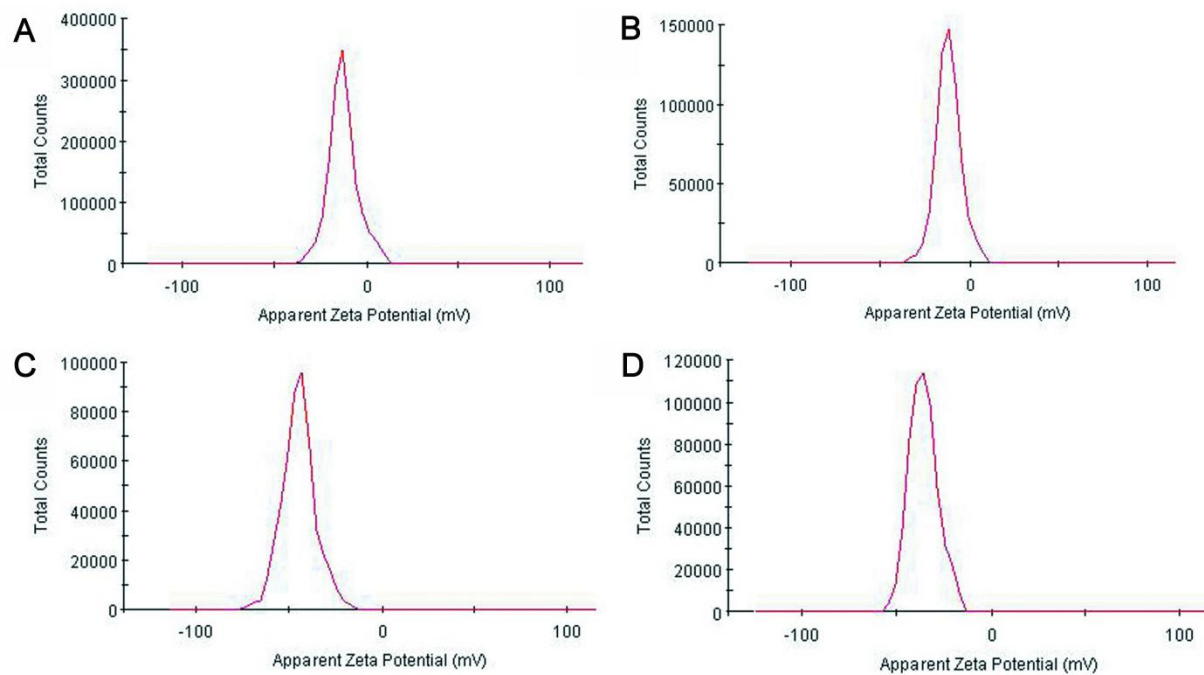

**Figure S11.** Viability of HeLa cells after incubation with PSMA@TB/NIR775 NPs with various concentrations for 24 h.

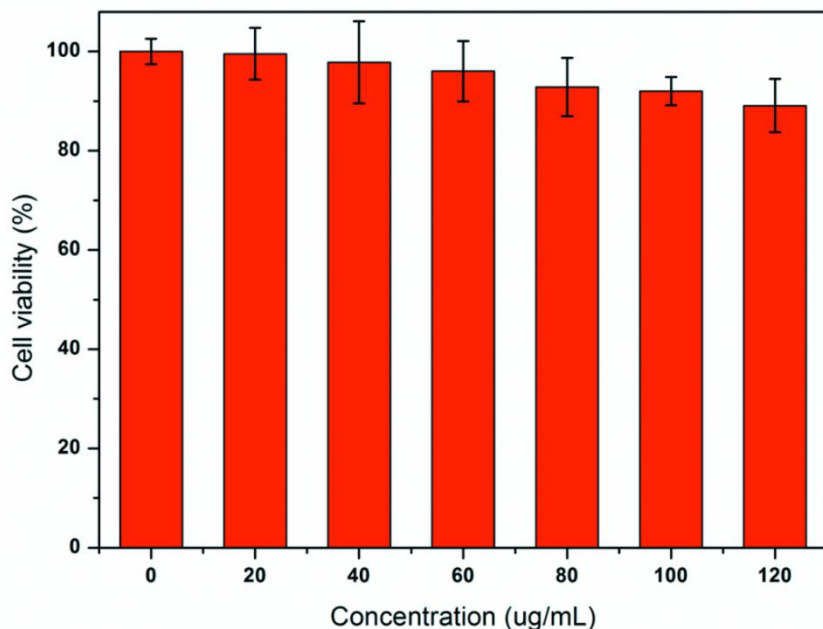

**Figure S12.** 3PL imaging of brain blood vessels of a mouse treated with PS-PEG@TB NPs, at various vertical depths: (A) 45  $\mu\text{m}$ , (B) 195  $\mu\text{m}$ , (C) 285  $\mu\text{m}$ , (D) 385  $\mu\text{m}$ , (E) 485  $\mu\text{m}$ , (F) 585  $\mu\text{m}$  and (G) 635  $\mu\text{m}$ ; (H) A stacked three-photon fluorescence image from a depth of 0  $\mu\text{m}$  to 635  $\mu\text{m}$ . Scale bar: 100  $\mu\text{m}$ .

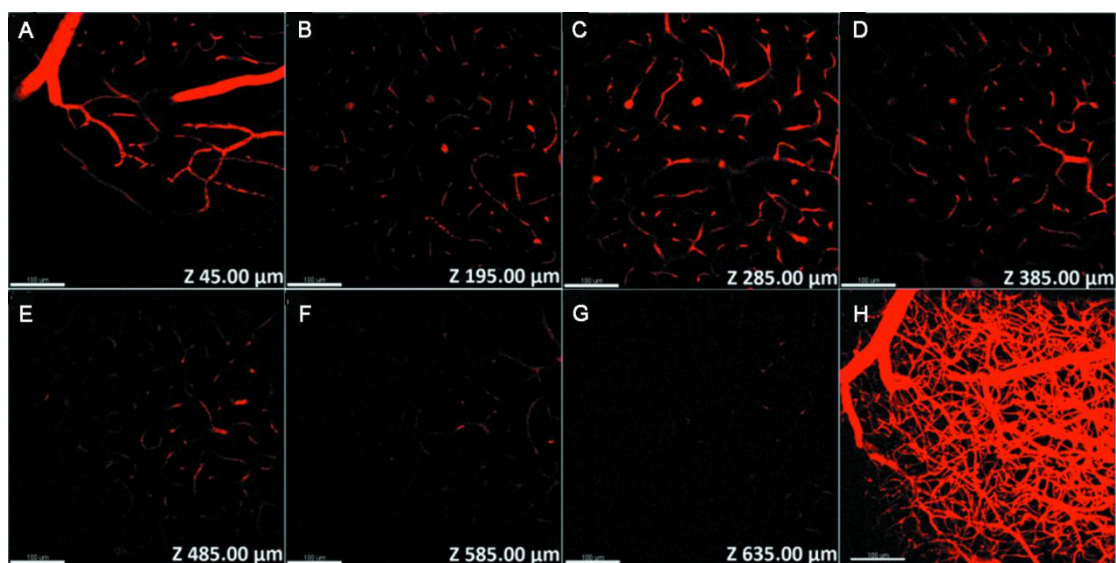

**Figure S13.** A 3D reconstructed image showing the distribution of the PS-PEG@TB NPs in brain blood vessels of the mouse (imaging depth: 635  $\mu\text{m}$ ). Scale bar: 100 $\mu\text{m}$ .

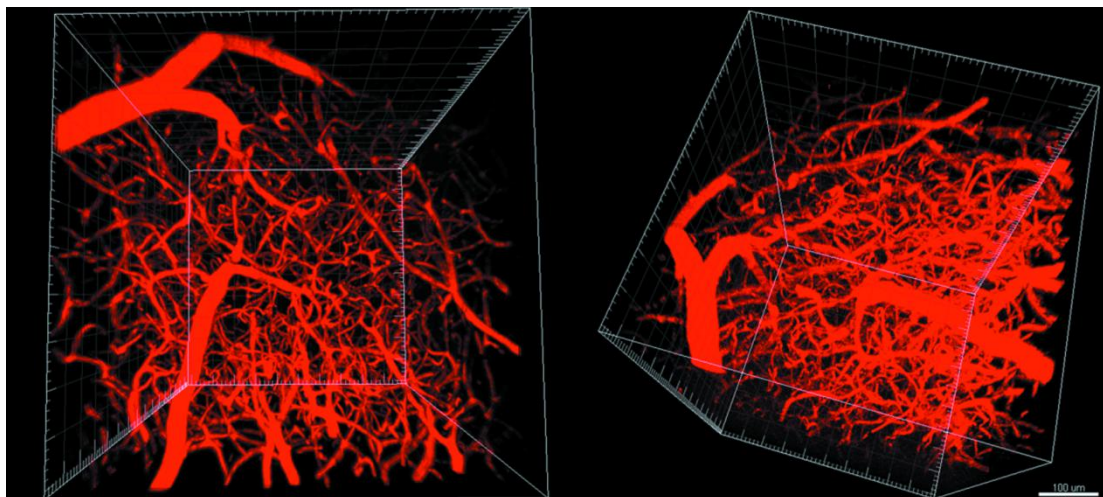

**Figure S14.** Photostability of nanoparticles encapsulated by PS-PEG upon two-photon laser irradiation. Excitation: 1550 nm.

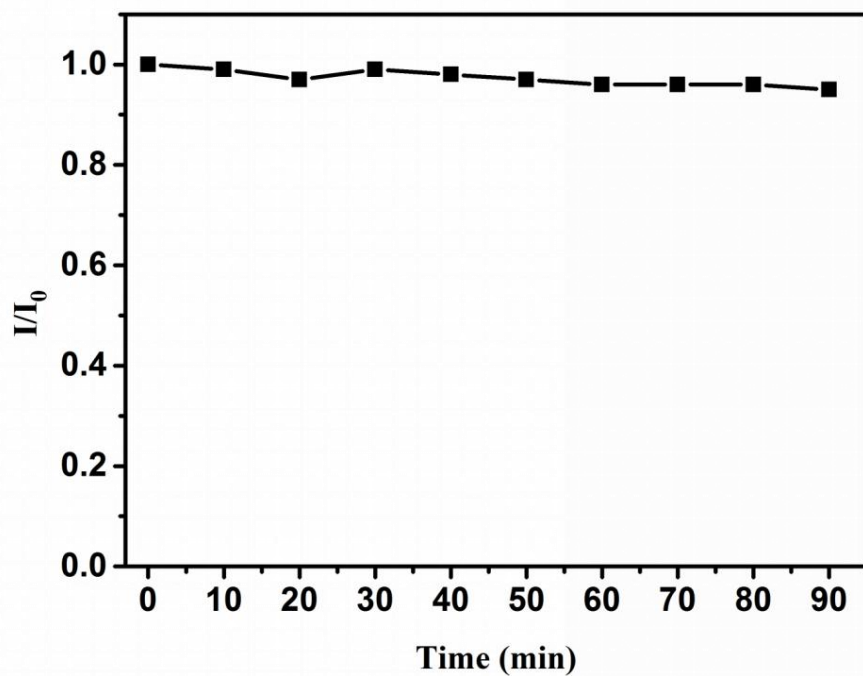



**Table S1.** The photophysical properties of nanoparticles.

---

|           | $\tau(\text{ns})$ | $k_r / 10^7(\text{s}^{-1})$ | $k_{nr} / 10^8(\text{s}^{-1})$ |
|-----------|-------------------|-----------------------------|--------------------------------|
| F127@TB   | 2.64              | 0.43                        | 3.75                           |
| PIMA@TB   | 3.22              | 1.37                        | 2.97                           |
| PSMA@TB   | 4.09              | 4.89                        | 1.69                           |
| PS-PEG@TB | 4.26              | 6.36                        | 1.71                           |

---
